# Supplementary material for: Effect of the triptycene scaffold on the photophysical, electrochemical and electroluminescence properties of the iridium(iii) complex
Source: Royal Society of Chemistry journal article supplement (doi:10.1039/d0nj01930e), 2020-01-01
Supplement: d0nj01930e1.pdf [file d0nj01930e1.pdf]

## Supporting Information

### Effect of the triptycene scaffold on the photophysical, electrochemical and electroluminescence properties of iridium(III) complex

Yue-Yue Zhou,<sup>†a</sup> Ding-Yan Xu,<sup>†b</sup> Wei Cheng,<sup>a</sup> Yue Wang,<sup>a</sup> Bi-Hai Tong,<sup>\*a</sup> Gu-Feng He,<sup>\*b</sup>  
Yong-Pan Tian<sup>\*a</sup>

<sup>a</sup>Key Laboratory of Metallurgical Emission Reduction & Resources Recycling, Ministry of Education, Institute of Molecular Engineering and Applied Chemistry, School of Metallurgy Engineering, Anhui University of Technology, Maanshan, 243002, Anhui, China. E-mail:

[tongbihai@163.com](mailto:tongbihai@163.com), [916162456@qq.com](mailto:916162456@qq.com)

<sup>b</sup>National Engineering Lab for TFT-LCD Materials and Technologies, Department of Electronic Engineering, Shanghai Jiao Tong University, Shanghai, 200240, China. E-mail:

[gufenghe@sjtu.edu.cn](mailto:gufenghe@sjtu.edu.cn)

<sup>†</sup> Authors contributed equally.

#### Contents:

1. **Fig. S1** The room temperature emission decay curves of as-prepared complexes in PMMA films at a conc. of 1 wt% and 30 wt%.
2. <sup>1</sup>H- and <sup>19</sup>F-NMR spectra of all new compounds.
3. Mass spectra of all new compounds.
4. CHN analysis of new complexes.

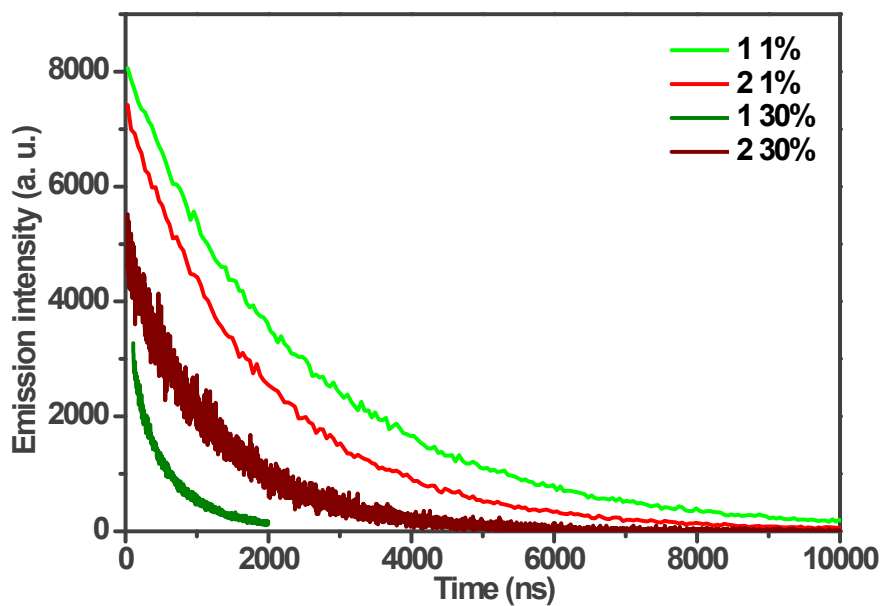

**Fig. S1** The room temperature emission decay curves of as-prepared complexes in PMMA films at a conc. of 1 wt% and 30 wt%.

## 2. $^1\text{H}$ - and $^{19}\text{F}$ -NMR spectra of all new compounds.

$^1\text{H}$ -NMR spectrum of **1-methyltriptycene** in  $\text{CDCl}_3$  (400 MHz):

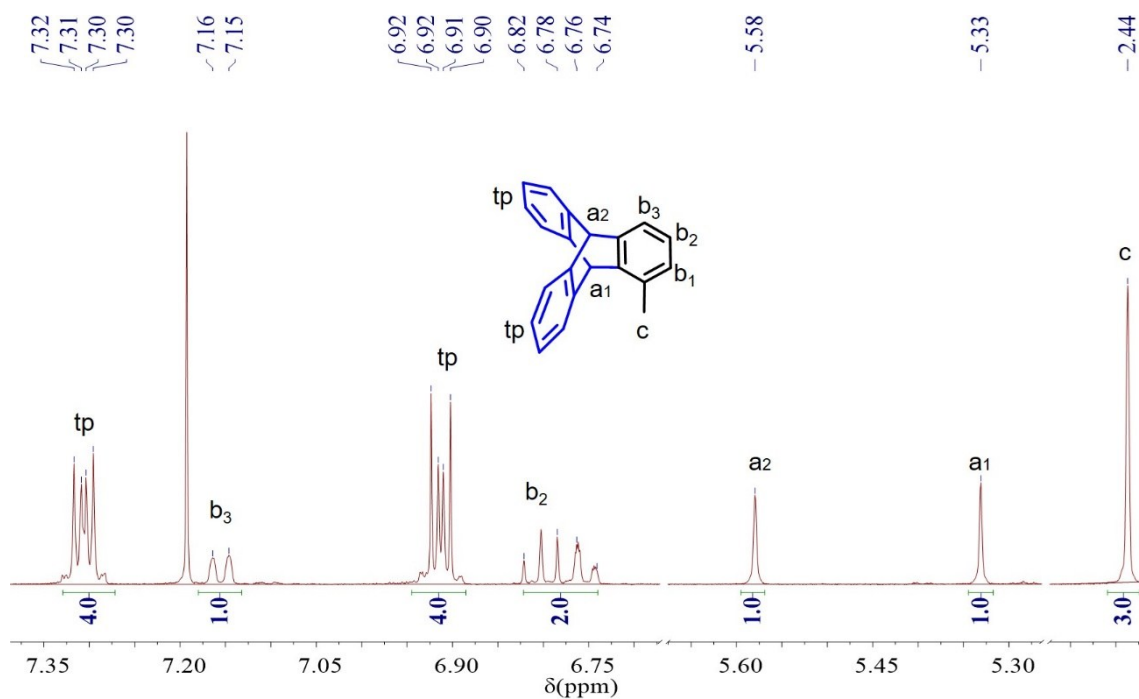

$^1\text{H-NMR}$  spectrum of **1-formyltritycene** in  $\text{CDCl}_3$  (400 MHz):

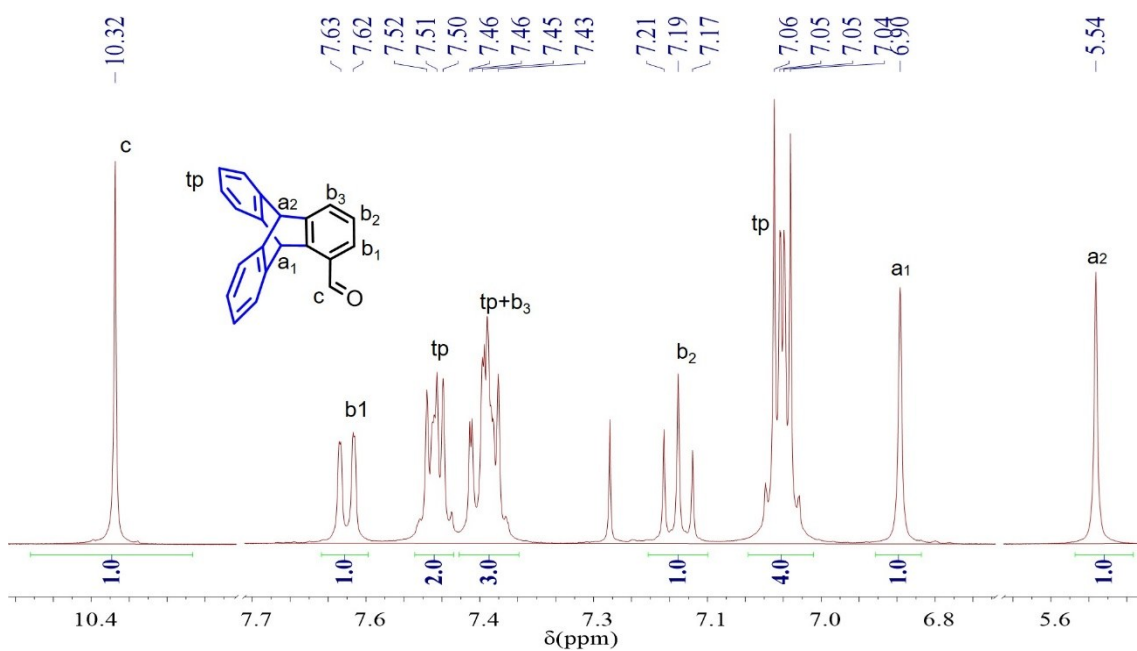

$^1\text{H-NMR}$  spectrum of **tbth** in  $\text{CDCl}_3$  (400 MHz):

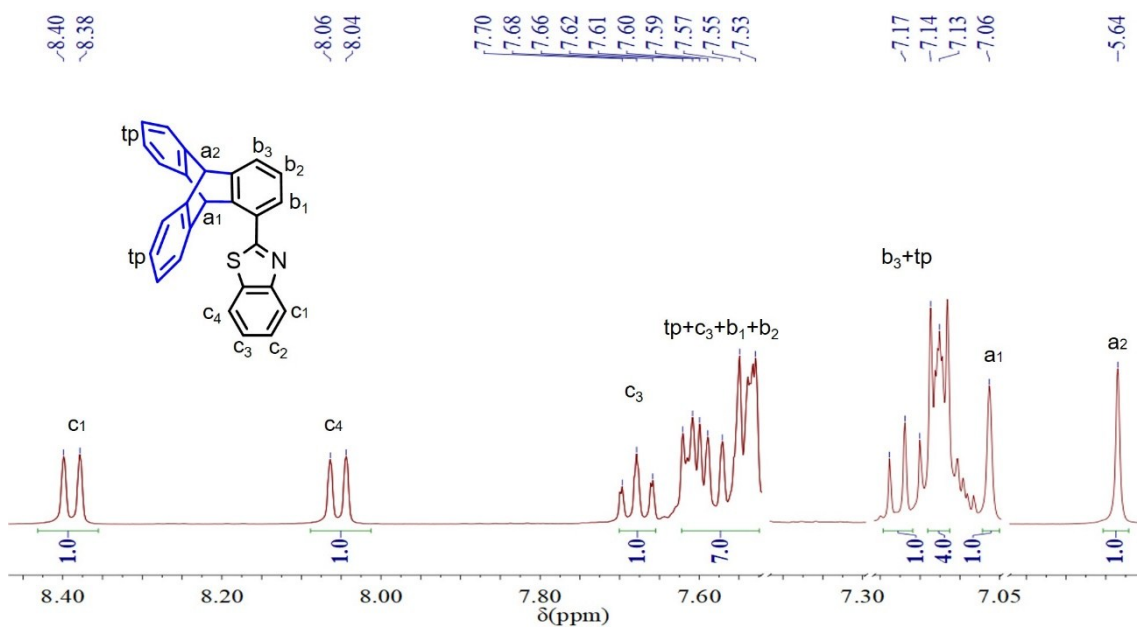

$^1\text{H-NMR}$  spectrum of complex **1** in  $\text{CDCl}_3$  (400 MHz):

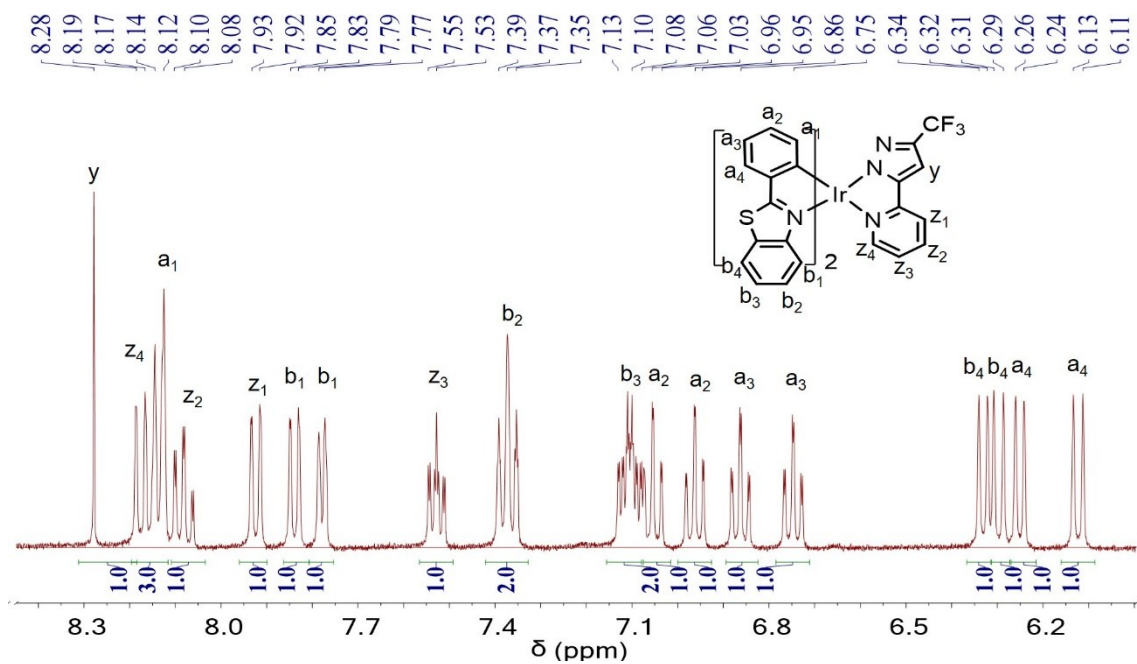

<sup>19</sup>F-NMR spectrum of complex 1 in CDCl<sub>3</sub> (376 MHz):

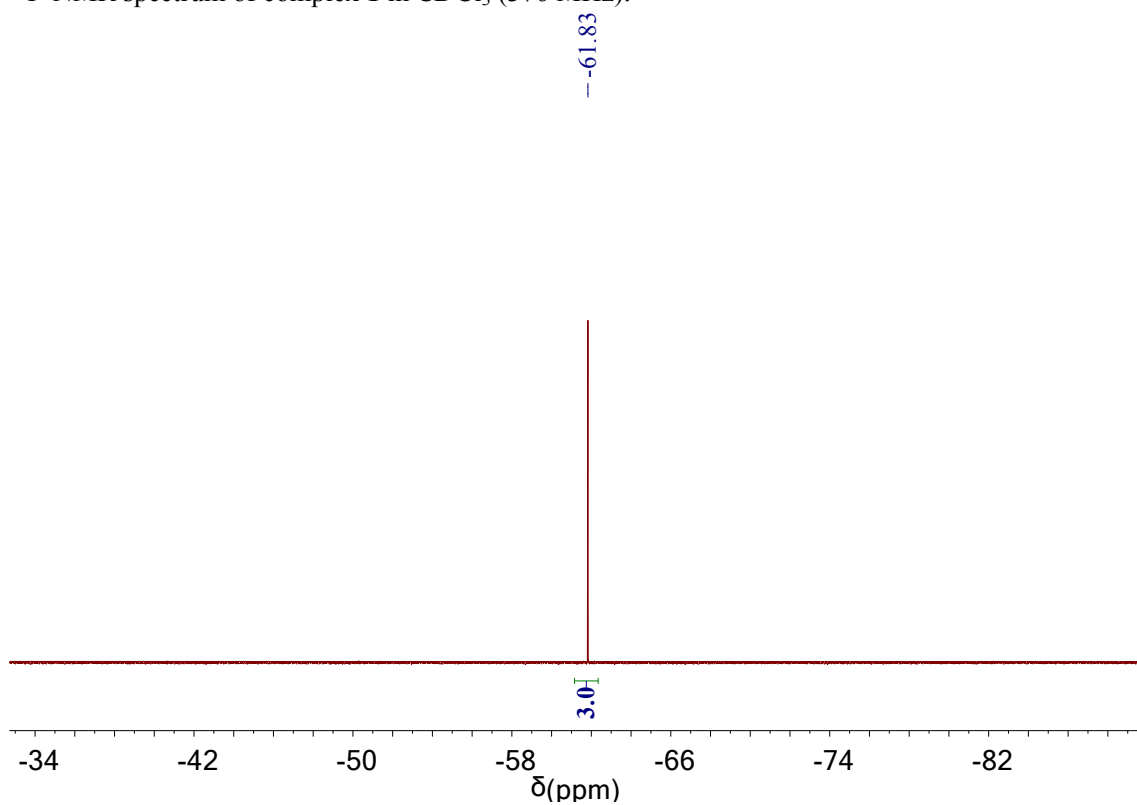

<sup>1</sup>H-NMR spectrum of complex 2 in CDCl<sub>3</sub> (400 MHz):

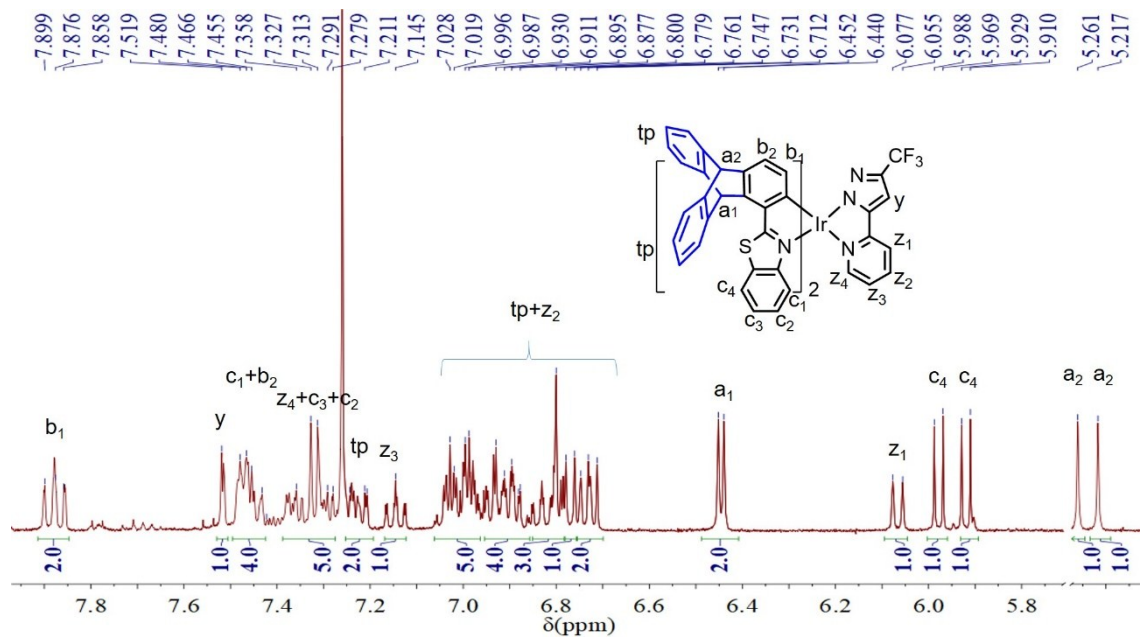

<sup>19</sup>F-NMR spectrum of complex 2 in CDCl<sub>3</sub> (376 MHz):

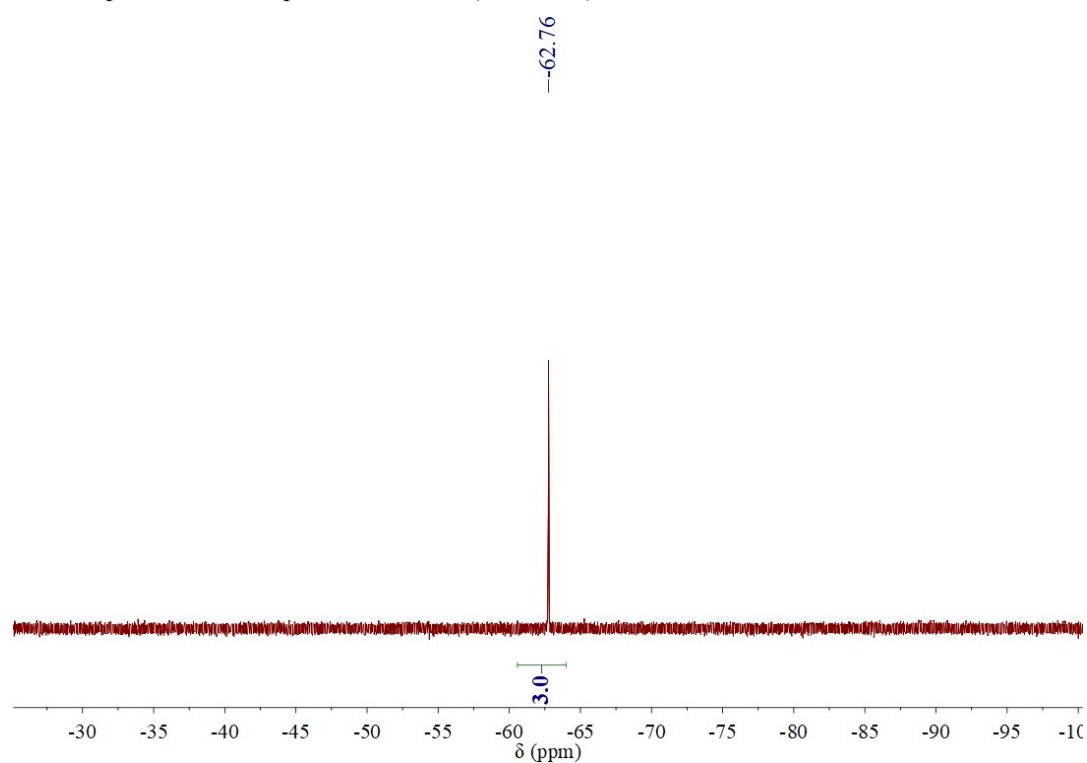

### 3. Mass spectra of all new compounds.

HRMS spectrum of 1-methyltriptycene:

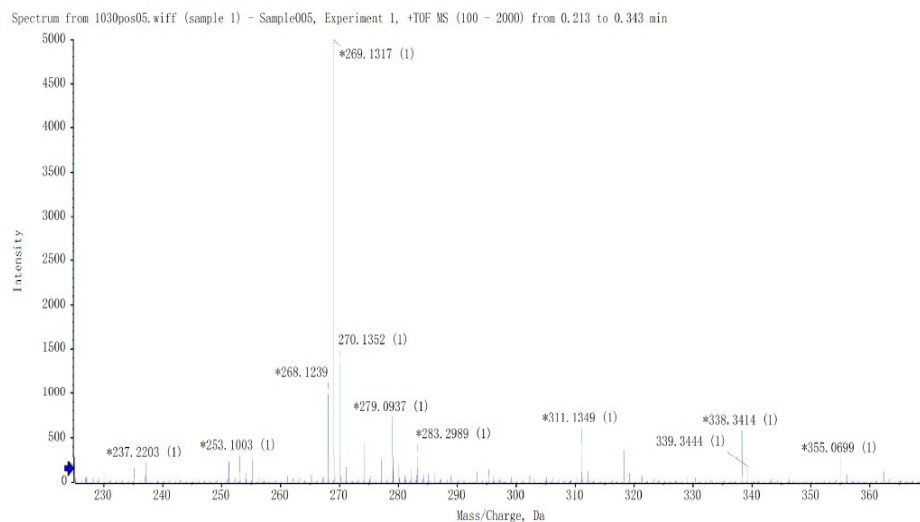

HRMS spectrum of 1-formyltryptene:

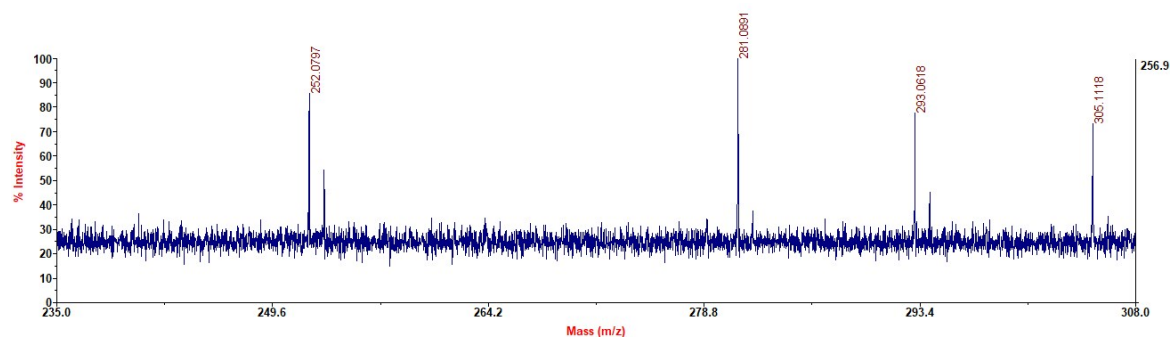

MS spectrum of **tbH**:

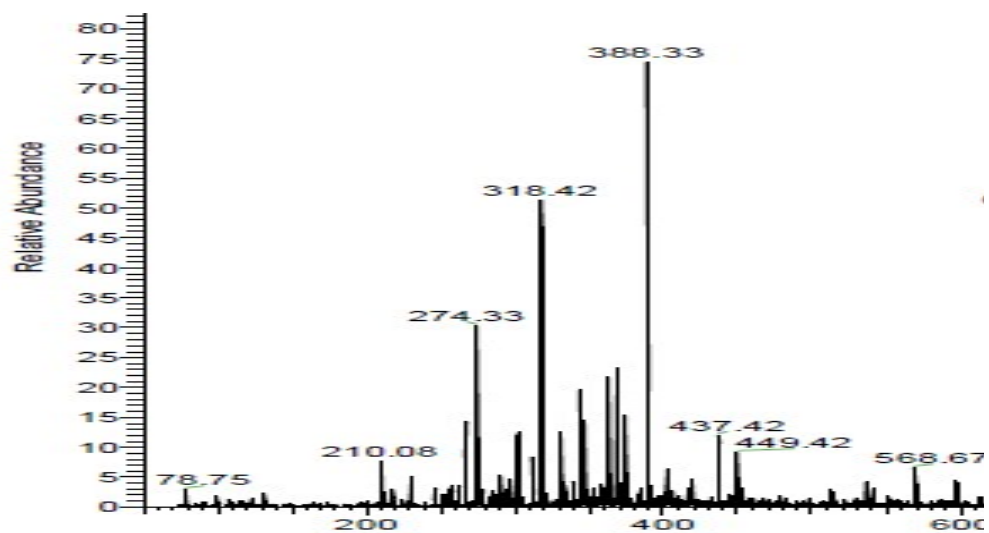

HRMS spectrum of complex 1:

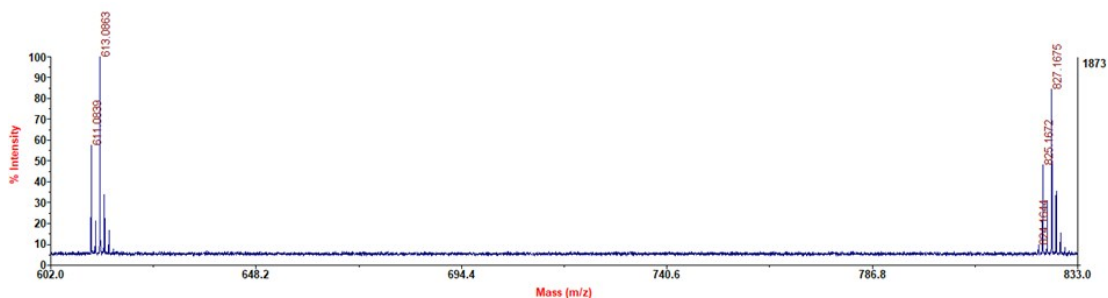

### HRMS spectrum of complex 2:

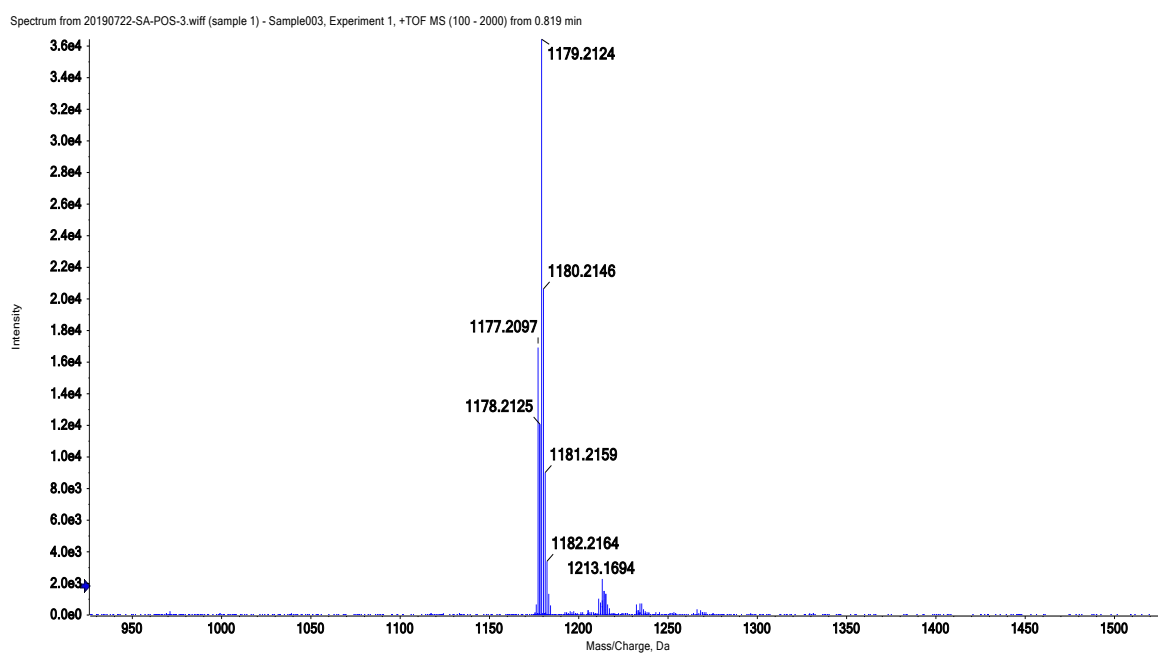

### 4. CHN analysis of new complexes.

| Sample    | C (%) | H (%) | N (%) |
|-----------|-------|-------|-------|
| Complex 1 | 50.68 | 2.61  | 8.43  |
| Complex 2 | 64.01 | 3.22  | 5.89  |
